# Supplementary material for: A Novel Peptide for Simultaneously Enhanced Treatment of Head and Neck Cancer and Mitigation of Oral Mucositis
Source: PubMed Central journal article supplement (PMC4822960; doi:10.1371/journal.pone.0152995), 2016-04-06
Supplement: pone.0152995.s001.pdf [file pone.0152995.s001.pdf]

**S1 Table. Top 20 genes with fold changes in SCC-61 and HaCaT cells treated with AMP-18.** Cells were exposed to AMP-18 for 2 h, total RNA was purified and subjected to RNA microarray analysis. Differentially expressed genes were identified as stated in the Methods with no AMP-18 treatment as a control.

| <b>Gene symbol</b> | <b>Fold change</b> |
|--------------------|--------------------|
| IL6                | 31.25              |
| LCN2               | 28.23              |
| SAA1               | 18.12              |
| LOC100134134       | 15.79              |
| TIMP2              | 14.76              |
| PLAT               | 14.24              |
| CFB                | 11.44              |
| SLC16A2            | 9.63               |
| TTYH3              | 6.19               |
| TM4SF19            | 5.78               |
| CEACAM6            | 5.63               |
| LGALS3BP           | 5.22               |
| FBLN1              | 4.91               |
| FAT1               | 4.56               |
| NEU1               | 3.97               |
| KRT16              | 3.97               |
| FAS                | 3.94               |
| FAM46A             | 3.87               |
| FAM20C             | 3.70               |
